# Supplementary material for: Systematic Review and Meta-Analysis on Human African Trypanocide Resistance
Source: MDPI journal article supplement (doi:10.3390/pathogens11101100), 2022-09-25
Supplement: s1 [file s1]

## Supplementary file S1: Keyword Database search criteria

AMED (Allied and Complementary Medicine) <1985 to March 2022>

CAB Abstracts <1973 to 2022 Week 13>

APA PsycInfo <1806 to March Week 4 2022>

Books@Ovid <March 28, 2022>

Journals@Ovid Full Text <April 01, 2022>

Your Journals@Ovid

APA PsycArticles Full Text

CAB Abstracts <1910 to 1989>

Embase Classic+Embase <1947 to 2022 April 01>

Global Health <1910 to 2022 Week 13>

Ovid MEDLINE(R) and Epub Ahead of Print, In-Process, In-Data-Review & Other Non-Indexed Citations, Daily and Versions <1946 to April 01, 2022>

- 1 exp African trypanosomiasis/ 20006
- 2 african trypanosomiasis/ or trypanosoma brucei/ or trypanosomiasis/ or tsetsefly-borne diseases/ 97596
- 3 exp trypanosoma gambiense/ 13678
- 4 exp trypanosoma rhodesiense/ 13672
- 5 exp trypanocides/ 40634
- 6 exp suramin/ 12879
- 7 exp melarsoprol/ 2171
- 8 exp eflornithine/ 7707
- 9 exp nifurtimox/ 4300
- 10 Trypanosoma gambiense.od. 6512
- 11 exp pentamidine/ 14248
- 12 Trypanosoma.od. and eflornithine.sh. and Trypanosoma gambiense.od. and nifurtimox.sh. 24
- 13 exp drug resistance/ 937256
- 14 1 and 220006
- 15 HAT.mp. [mp=ab, hw, ti, ot, bt, id, cc, tc, tm, mf, tx, ct, tn, dm, dv, kf, fx, dq, nm, ox, px, rx, ui, sy] 63632

|    |                              |       |
|----|------------------------------|-------|
| 16 | 14 or 15                     | 81076 |
| 17 | 3 or 4                       | 17702 |
| 18 | 16 and 17                    | 10047 |
| 19 | 6 or 7 or 8 or 9 or 11 or 12 | 37790 |
| 20 | exp pentamidine/             | 14248 |
| 21 | 19 or 20                     | 37790 |
| 22 | 18 and 21                    | 1251  |
| 23 | 13 and 22                    | 172   |

Breakdown per database:

|                                                                                                                                                                 |     |
|-----------------------------------------------------------------------------------------------------------------------------------------------------------------|-----|
| 13 and 22                                                                                                                                                       | 172 |
| <u>CAB Abstracts &lt;1973 to 2022 Week 13&gt;</u>                                                                                                               | 45  |
| <u>CAB Abstracts &lt;1910 to 1989&gt;</u>                                                                                                                       | 5   |
| <u>Embase Classic+Embase &lt;1947 to 2022 April 01&gt;</u>                                                                                                      | 1   |
| <u>Global Health &lt;1910 to 2022 Week 13&gt;</u>                                                                                                               | 93  |
| <u>Ovid MEDLINE(R) and Epub Ahead of Print, In-Process, In-Data-Review &amp; Other Non-Indexed Citations, Daily and Versions &lt;1946 to April 01, 2022&gt;</u> | 28  |

URL:

<https://www.ezproxy.is.ed.ac.uk/login?url=http://ovidsp.ovid.com/ovidweb.cgi?T=JS&NEWS=N&PAGE=main&SHAREDSEARCHID=4rS3nFG7ZyFYFrGaPC86rkWf4dznjeUBLFzxmyVWoBq7avEPXOhTNZDrlgM0v4HVM>

Web of Science Interface

(((((ALL=((african trypanosomiasis)) OR ALL=(trypanosoma brucei)) OR ALL=('tsetsefly-borne diseases' OR 'HAT' or 'human African trypanosomiasis')))) AND ALL=((trypanosoma brucei gambiense) or (trypanosoma rhodesiense))) AND ALL=((suramin OR melarsoprol OR eflornithine OR nifurtimox OR pentamidine OR (NECT or (Nifurtimox Eflornithine Combination Therapy)))))) AND ALL=(trypanocides resistance or drug resistance) 110 papers

URL: <https://www.webofscience.com/wos/woscc/summary/4176f201-9404-43a1-967c-515eb4e2b1d8-2e9a627f/relevance/1>
